# Supplementary material for: Reversible assembly of silver nanoparticles driven by host–guest interactions based on water-soluble pillar[n]arenes
Source: Royal Society of Chemistry journal article supplement (doi:10.1039/c4cc01591f), 2014-01-01
Supplement: c4cc01591f1.pdf [file c4cc01591f1.pdf]

## Reversible assembly of silver nanoparticles driven by host–guest interactions based on water-soluble pillar[*n*]arenes

Yong Yao, Kecheng Jie, Yujuan Zhou, and Min Xue\*

*Department of Chemistry, Zhejiang University, 310027 Hangzhou, P. R. China; Fax: +86-571-8795-3189; Tel: +86-571-8795-3189; E-mail: xuemin@zju.edu.cn*

### Electronic Supplementary Information (6 pages)

|                                                               |    |
|---------------------------------------------------------------|----|
| 1. <i>Materials and methods</i>                               | S2 |
| 2. <i>Synthesis of WP5-stabilized AgNPs</i>                   | S2 |
| 3. <i>Assembly of WP5-stabilized AgNPs by addition of G</i>   | S3 |
| 4. <i>Disassembly of silver assemblies by addition of WP6</i> | S4 |
| 5. <i>References</i>                                          | S6 |

## 1. Materials and methods

The water-soluble pillar[5]arene **WP5**, water-soluble pillar[6]arene **WP6**, and guest molecules **G** were prepared according to the method previously reported.<sup>S1, S2, S3</sup> The TEM images were obtained using a JEM-1200EX instrument with an accelerating voltage of 80 kV. UV–Vis spectroscopy was measured on a Shimadzu UV-2501 PC UV–Vis spectrometer. The fluorescence titration experiments were conducted on a RF-5301 spectrofluorophotometer (Shimadzu Corporation, Japan).

## 2. Synthesis of **WP5**-stabilized silver nanoparticles

**WP5**-stabilized silver nanoparticles were synthesized by the reduction of AgNO<sub>3</sub> in the presence of **WP5**. In a typical synthesis, AgNO<sub>3</sub> (20.0  $\mu$ L, 10.0 mM) was added to deionized water (20.0 mL), followed by the addition of an aqueous solution of **WP5** (1.00 mL, 0.100 mM). NaBH<sub>4</sub> (20.0  $\mu$ L, 0.100 M) was freshly prepared with deionized ice water and added to the above reaction mixture while stirring. The solution immediately turned yellow and **WP5**-stabilized silver nanoparticles were thus obtained. This concentration of **WP5**-stabilized silver nanoparticles was used in all experiments unless otherwise noted.

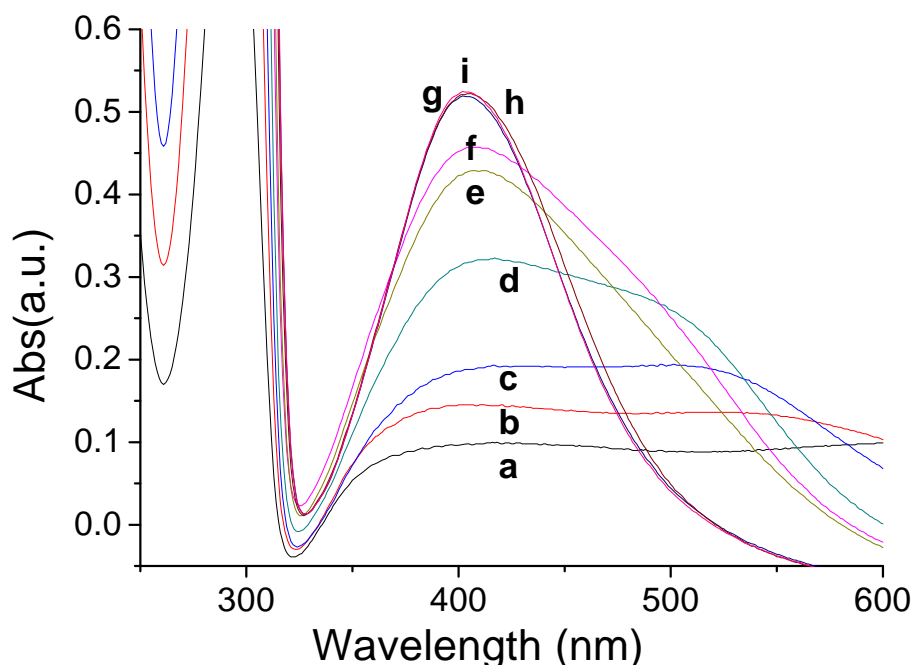

**Fig. S1.** UV–Vis spectra of silver nanoparticles with different concentrations of **WP5** as stabilizer: (a)  $2.00 \times 10^{-5}$  M; (b)  $5.00 \times 10^{-5}$  M; (c)  $1.00 \times 10^{-4}$  M; (d)  $1.50 \times 10^{-4}$  M; (e)  $2.00 \times 10^{-4}$  M; (f)  $3.00 \times 10^{-4}$  M; (g)  $4.00 \times 10^{-4}$  M; (h)  $6.00 \times 10^{-4}$  M; (i)  $8.00 \times 10^{-4}$  M.

3. Assembly of **WP5**-stabilized AgNPs by addition of **G**.

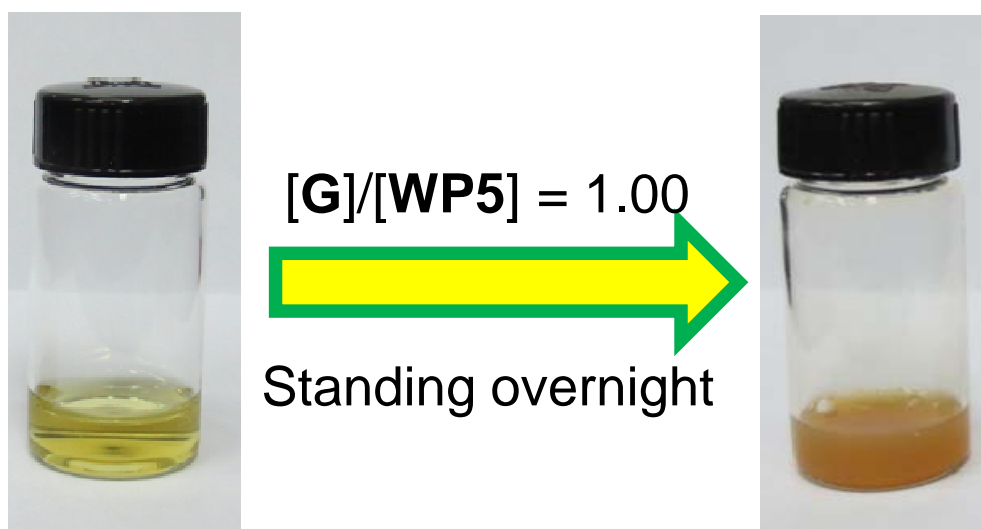

**Fig. S2.** Optical pictures of **WP5**-stabilized silver nanoparticles and after addition of **G**.  $[G]/[WP5] = 1.00$ .

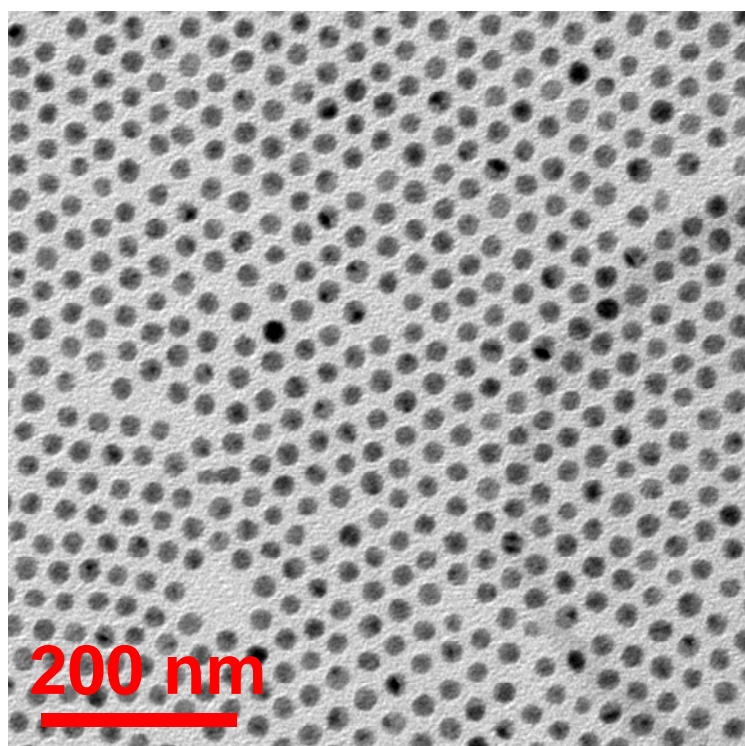

**Fig. S3.** TEM image of **WP5**-stabilized silver nanoparticles without **G**.

4. Disassembly of silver assemblies by addition of **WP6**.

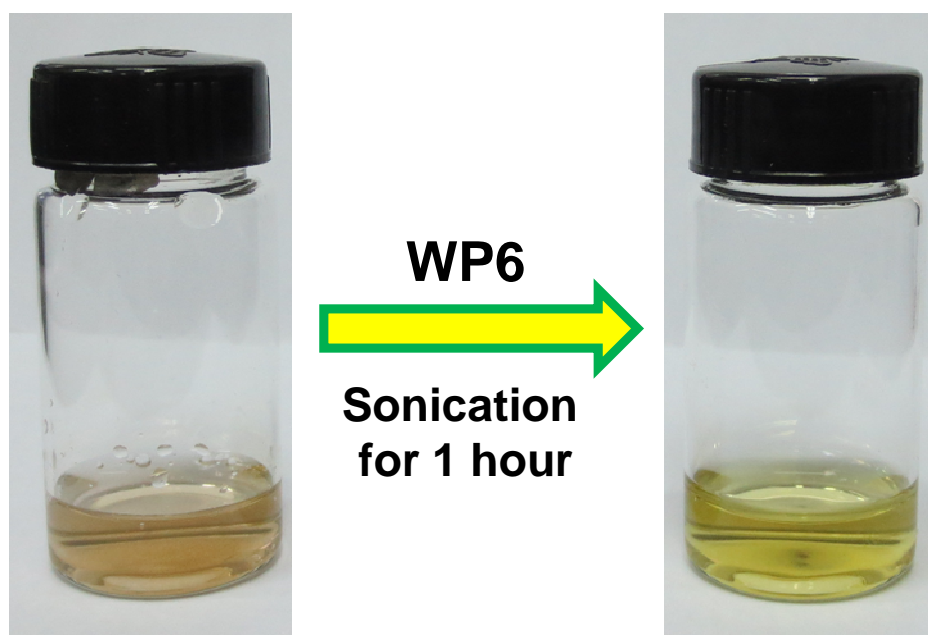

**Fig. S4.** Optical pictures of silver assemblies and after addition of excess **WP6**.

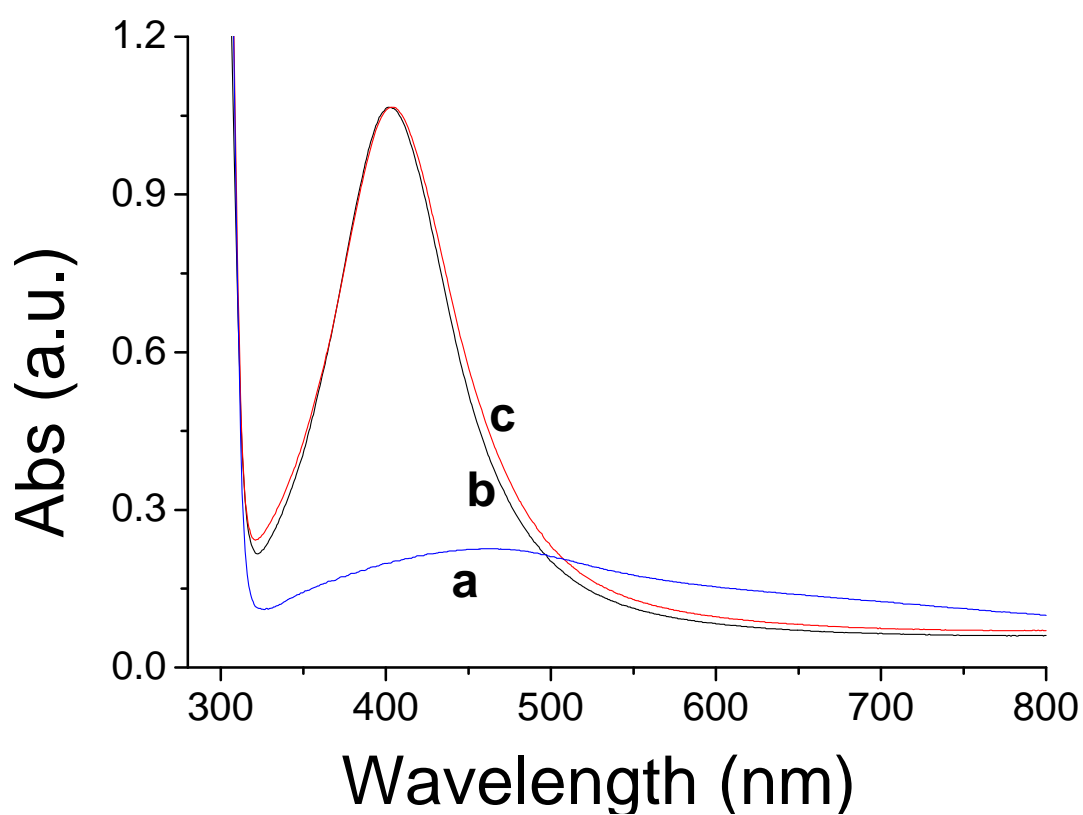

**Fig. S5.** UV–Vis spectra: (a) silver assemblies; (b) addition of excess **WP6** and sonication for 1 hour; (c) addition of excess **WP6** and sonication for 8 hour.

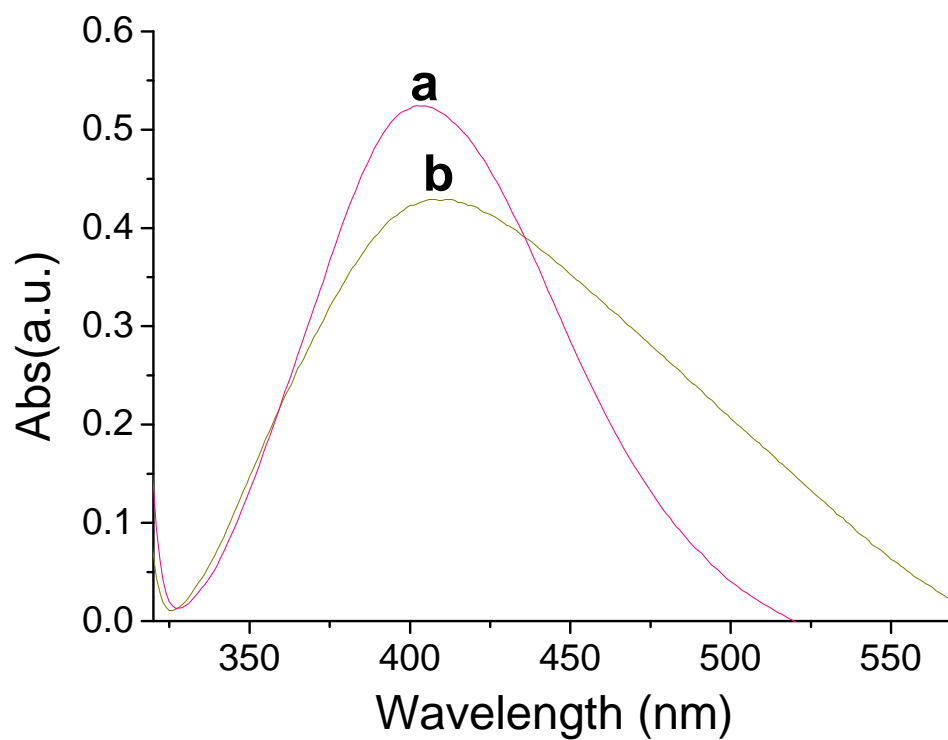

**Fig. S6.** UV–Vis spectra of silver nanoparticles: (a) after addition of excess **WP6** and sonication for 1 hour; (b) after centrifugation and subsequent immediate redispersion in water.

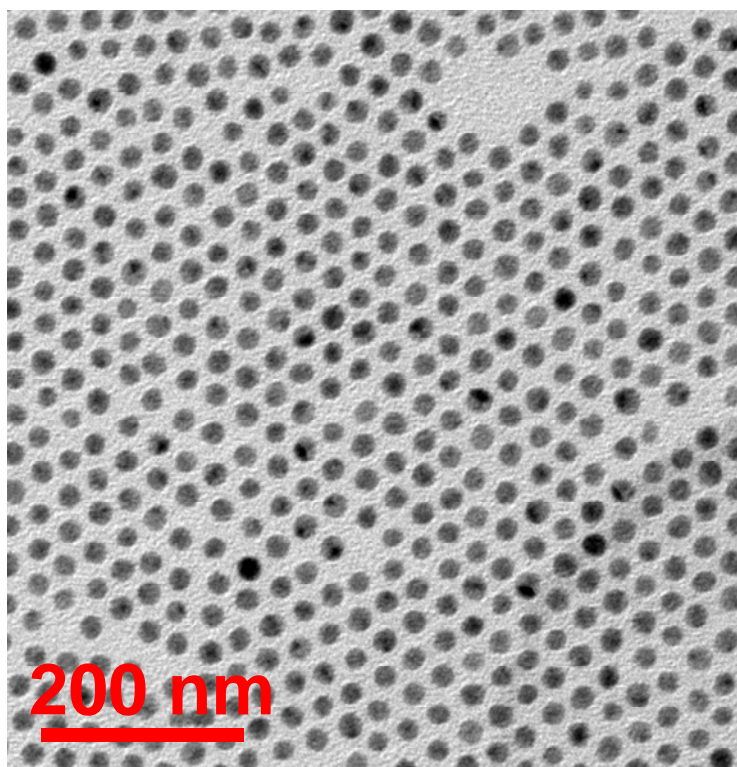

**Fig. S7.** TEM image of the redispersed **WP5** stabilized silver nanoparticles.

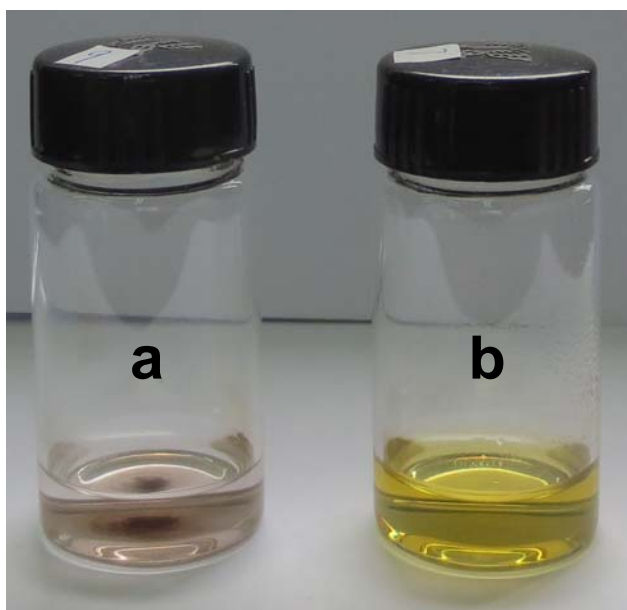

**Fig. S8.** Optical pictures: (a) silver assemble solution when  $[G]/[WP5]$  was as high as 10.0; (b) after addition of excess **WP6** and sonication for 1 hour.

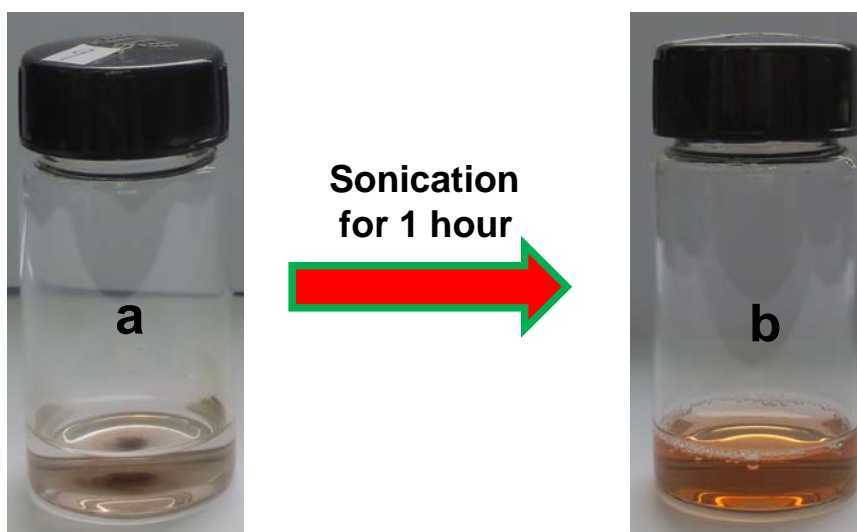

**Fig. S9.** Optical pictures: (a) silver assemble solution when  $[G]/[WP5]$  was as high as 10.0; (b) after sonication for 1 hour.

## 5. References:

- S1. (a) T. Ogoshi, M. Hashizume, T. Yamagishi and Y. Nakamoto, *Chem. Commun.*, 2010, **46**, 3708; (b) Y. Yao, Y. Zhou, J. Dai, S. Yue and M. Xue, *Chem. Commun.*, 2014, **50**, 869.
- S2. G. Yu, M. Xue, Z. Zhang, J. Li, C. Han and F. Huang, *J. Am. Chem. Soc.*, 2012, **134**, 13248
- S3. H. Li, D.-X. Chen, Y.-L. Sun, Y. B. Zheng, L.-L. Tan, P. S. Weiss and Y.-W. Yang, *J. Am. Chem. Soc.*, 2013, **135**, 1570.
